# Supplementary material
Source: Research Square preprint supplement (doi:10.21203/rs.3.rs-8420561/v1)
Supplement: Supplementary file 1 [file 501279765c485872a1defaf8.docx]

**Table** 1 Index selection and connotation

| **Index** | **Connotation** |
| --- | --- |
| Health institutions per 1000 population | It reflects the spatial distribution density of medical and health service outlets in the region |
| Number of beds in health institutions per 1000 population | Reflecting the hardware carrying capacity of medical infrastructure |
| Health technicians per 1000 population | Count the total number of professional and technical teams such as doctors, nurses and inspectors |
| Number of licensed (Assistant) doctors per 1000 population | Diagnosis and treatment ability of primary medical institutions |
| Registered nurses per 1000 population | Supply intensity of clinical nursing services |

**Tables** 2 Comparison of Health Resources per Thousand Population in Anhui Province between 2019 and 2023

| Area | 2019 | | | 2023 | | |
| --- | --- | --- | --- | --- | --- | --- |
| Southern Anhui | Central Anhui | Northern Anhui | Southern Anhui | Central Anhui | Northern Anhui |
| Number of health institutions per thousand population | 0.49 | 0.40 | 0.33 | 0.52 | 0.45 | 0.35 |
| Number of beds per thousand population in health institutions (sheets) | 5.58 | 4.77 | 4.12 | 5.85 | 5.20 | 4.30 |
| Number of health technicians per thousand population (person) | 5.36 | 5.10 | 4.02 | 5.60 | 5.40 | 4.20 |
| Number of practicing (assistant) physicians per thousand population (person) | 2.08 | 1.96 | 1.52 | 2.15 | 2.10 | 1.60 |
| Registered nurses per thousand population (person) | 2.81 | 1.95 | 1.69 | 3.05 | 2.30 | 1.80 |
| Health Resource Allocation Index (HRI) | 3.264 | 2.836 | 2.336 | 3.434 | 3.090 | 2.450 |

**Tables** 3 Indicator Weights of Health Resource Allocation in Anhui Province from 2019 to 2023

| **Indicator** | 2019 | 2020 | 2021 | 2022 | 2023 |
| --- | --- | --- | --- | --- | --- |
| Number of health institutions per thousand population | 0.182 | 0.175 | 0.168 | 0.162 | 0.158 |
| Number of beds per thousand population in healthcare institutions | 0.205 | 0.198 | 0.192 | 0.185 | 0.180 |
| Number of healthcare technicians per thousand population | 0.215 | 0.223 | 0.230 | 0.235 | 0.241 |
| Number of practicing (assistant) physicians per thousand population | 0.198 | 0.206 | 0.213 | 0.220 | 0.228 |
| Registered nurses per thousand population | 0.200 | 0.198 | 0.197 | 0.198 | 0.193 |

**Tables** 4 Entropy value of health resource allocation indicators in Anhui Province from 2019 to 2023

| **Indicator** | 2019 | 2020 | 2021 | 2022 | 2023 |
| --- | --- | --- | --- | --- | --- |
| Number of health institutions per thousand population | 0.912 | 0.907 | 0.901 | 0.896 | 0.89 |
| Number of beds per thousand population in healthcare institutions | 0.885 | 0.879 | 0.872 | 0.866 | 0.86 |
| Number of healthcare technicians per thousand population | 0.862 | 0.851 | 0.839 | 0.829 | 0.817 |
| Number of practicing (assistant) physicians per thousand population | 0.878 | 0.865 | 0.853 | 0.84 | 0.827 |
| Registered nurses per thousand population | 0.875 | 0.873 | 0.871 | 0.87 | 0.868 |

**Tables** 5 Comprehensive evaluation C value and ranking of health resources entropy weight TOPSIS method in Anhui Province

| year | 2019 | | 2020 | | 2021 | | 2022 | | 2023 | |
| --- | --- | --- | --- | --- | --- | --- | --- | --- | --- | --- |
| Area | C | sort | C | sort | C | sort | C | sort | C | sort |
| Southern Anhui | 0.682 | 1 | 0.695 | 1 | 0.703 | 2 | 0.715 | 2 | 0.728 | 2 |
| Central Anhui | 0.635 | 2 | 0.658 | 2 | 0.712 | 1 | 0.732 | 1 | 0.745 | 1 |
| Northern Anhui | 0.521 | 3 | 0.533 | 3 | 0.549 | 3 | 0.563 | 3 | 0.578 | 3 |

**Table** 6 Distribution Results of RSR Method for Health Resources in Anhui Province

| area | RSR distribution value Ci | frequency | Cumulative Frequency  Σf | Evaluation rank‾R | Accumulated frequency downwards  P=‾R/n×100% | Probit |
| --- | --- | --- | --- | --- | --- | --- |
| | Southern Anhui | | --- | | 0.551 | 1 | 1 | 1 | 33.33 | 4.33 |
| Central Anhui | 0.696 | 1 | 2 | 2 | 66.67 | 5.44 |
| Northern Anhui | 0.705 | 1 | 3 | 3 | 91.67* | 6.38 |

**Table** 7 RSR Grading Results

| Critical | value of gear percentile | Probit | Regional classification results |
| --- | --- | --- | --- |
| Poor | ≤33.33% | ≤4.50 | Northern Anhui（RSR=0.551） |
| average | （33.34%，66.66%） | (4.50，6.00) | Central Anhui（RSR=0.696） |
| excellent | ≥66.67% | ≥6.00 | Southern Anhui（RSR=0.705） |
